# Supplementary material for: The effect of perioperative probiotics and synbiotics on postoperative infections in patients undergoing major liver surgery: a meta-analysis of randomized controlled trials
Source: PeerJ journal article supplement (doi:10.7717/peerj.18874), 2025-02-17
Supplement: Graphical_abstract.pdf [file Graphical_abstract.pdf]

# The effect of perioperative probiotics and synbiotics on postoperative infections in patients undergoing major liver surgery

## A meta-analysis of 10 randomized controlled trials

### POPULATION

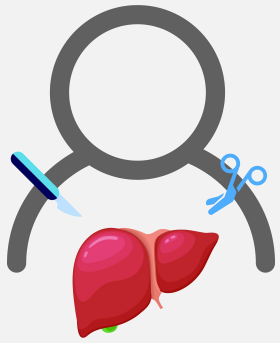

Adult patients undergoing major liver surgeries (including liver resections and transplantations)

### INTERVENTION

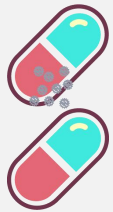

Enteral probiotics/synbiotics

Enteral placebo

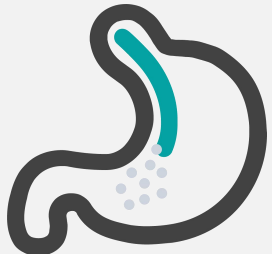

### OUTCOMES

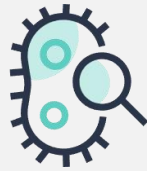

Postoperative infections  
10 RCTs, 582 participants

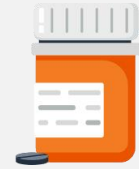

Duration of antibiotic therapy  
5 RCTs, 298 participants

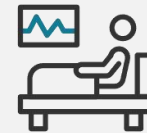

Length of ICU stay  
7 RCTs, 428 participants

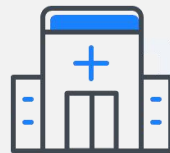

Length of hospital stay  
8 RCTs, 509 participants

### FINDINGS

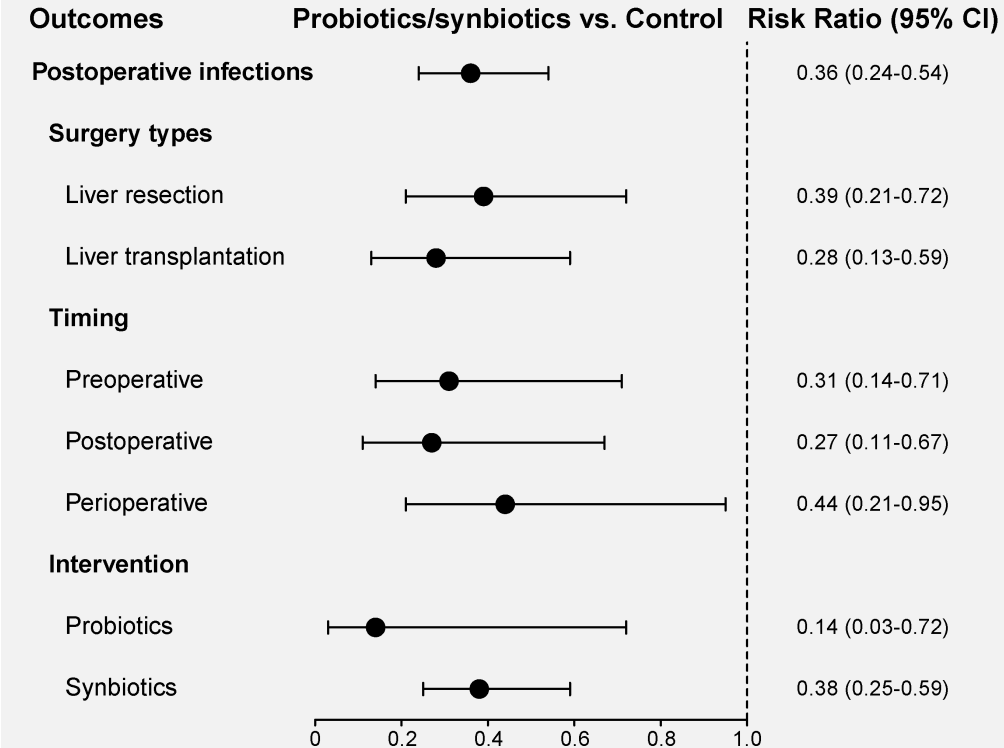

**Duration of antibiotic therapy** MD -2.82 (-3.13, -2.51)

**Length of ICU stay** MD -0.25 (-0.84, 0.34)

**Length of hospital stay** MD -1.25 (-2.74, 0.25)
